# Supplementary material
Source: PubMed Central journal article supplement (PMC8338789)
Supplement: NIHMS1692609-supplement-2.pdf [file NIHMS1692609-supplement-2.pdf]

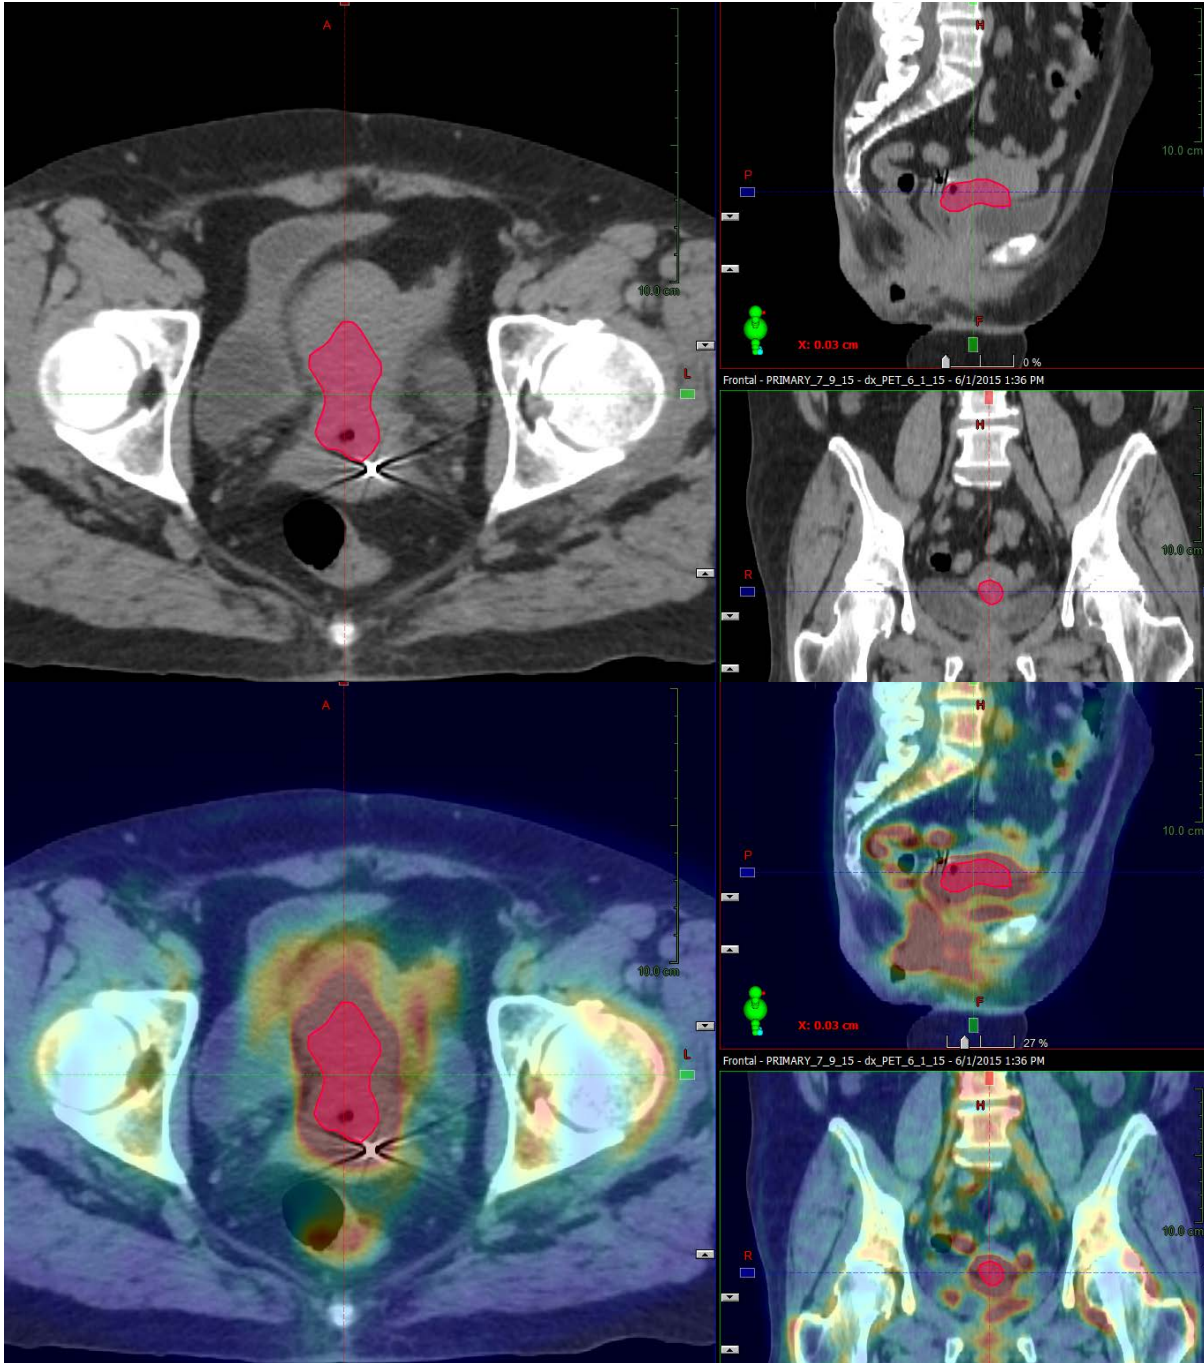

**Figure 2S.** Representative image of an auto-contoured metabolic tumor volume on simulation CT scan fused with a diagnostic PET scan. The PET scan was obtained with a Foley catheter. The large tumor can clearly be delineated from the bladder on the fused PET scan.
