# Supplementary material
Source: PubMed Central journal article supplement (PMC8338789)
Supplement: NIHMS1692609-supplement-3.pdf [file NIHMS1692609-supplement-3.pdf]

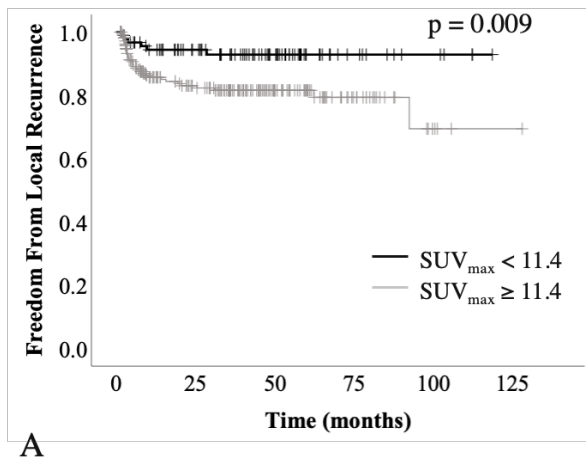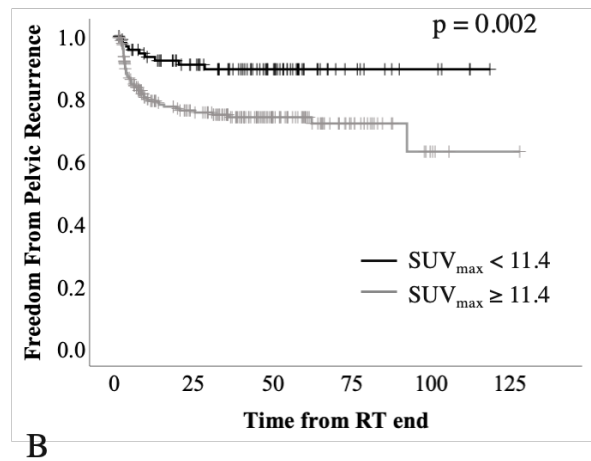

**Figure 3S.** Prognostic significance of  $SUV_{max}$  for local (cervix) recurrence (A) and any pelvic recurrence (B). An  $SUV_{max}$  cutoff of 11.4 was prognostic for both of these outcomes.
