# Supplementary material
Source: PubMed Central journal article supplement (PMC8338789)
Supplement: NIHMS1692609-supplement-4.pdf [file NIHMS1692609-supplement-4.pdf]

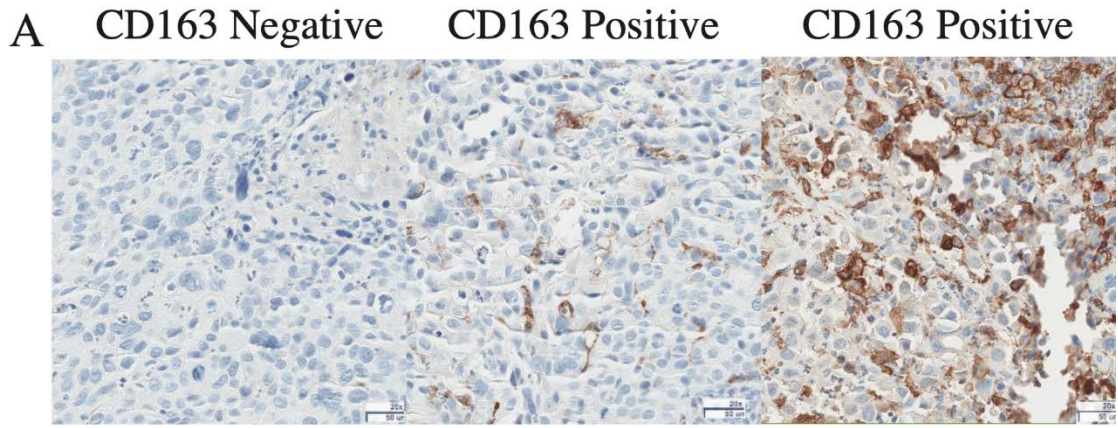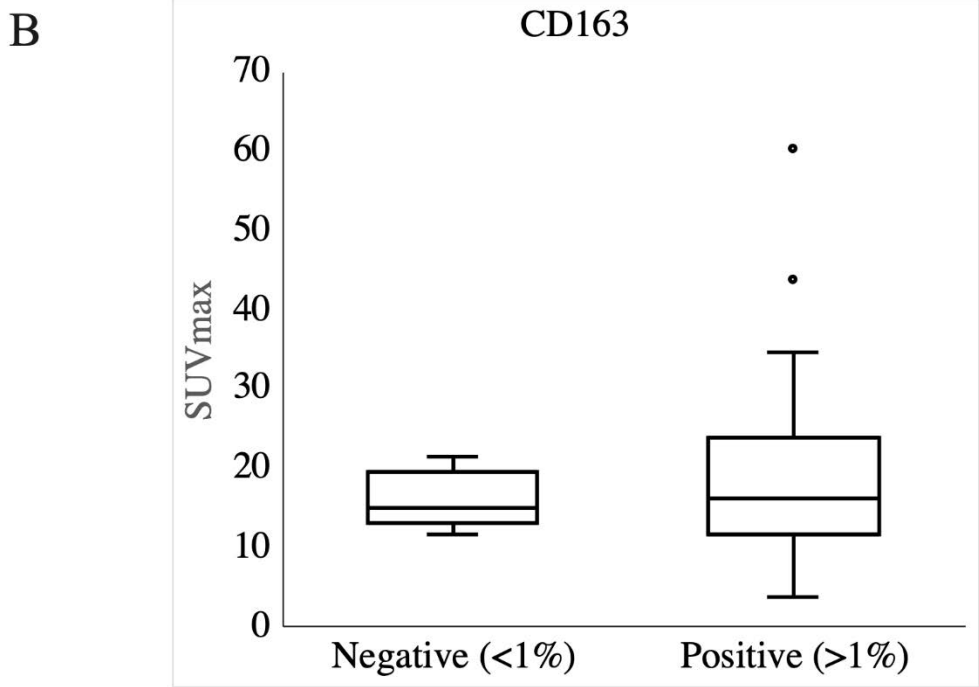

**Figure 4S.** Tissue microarray staining for CD163, a marker for M2 polarized macrophages. Examples of negative and positive staining are shown in A. There was no significant difference in the average  $SUV_{max}$  between cells that stained negative for CD163, and those that stained positive (B).
