# Supplementary material
Source: PubMed Central journal article supplement (PMC8338789)

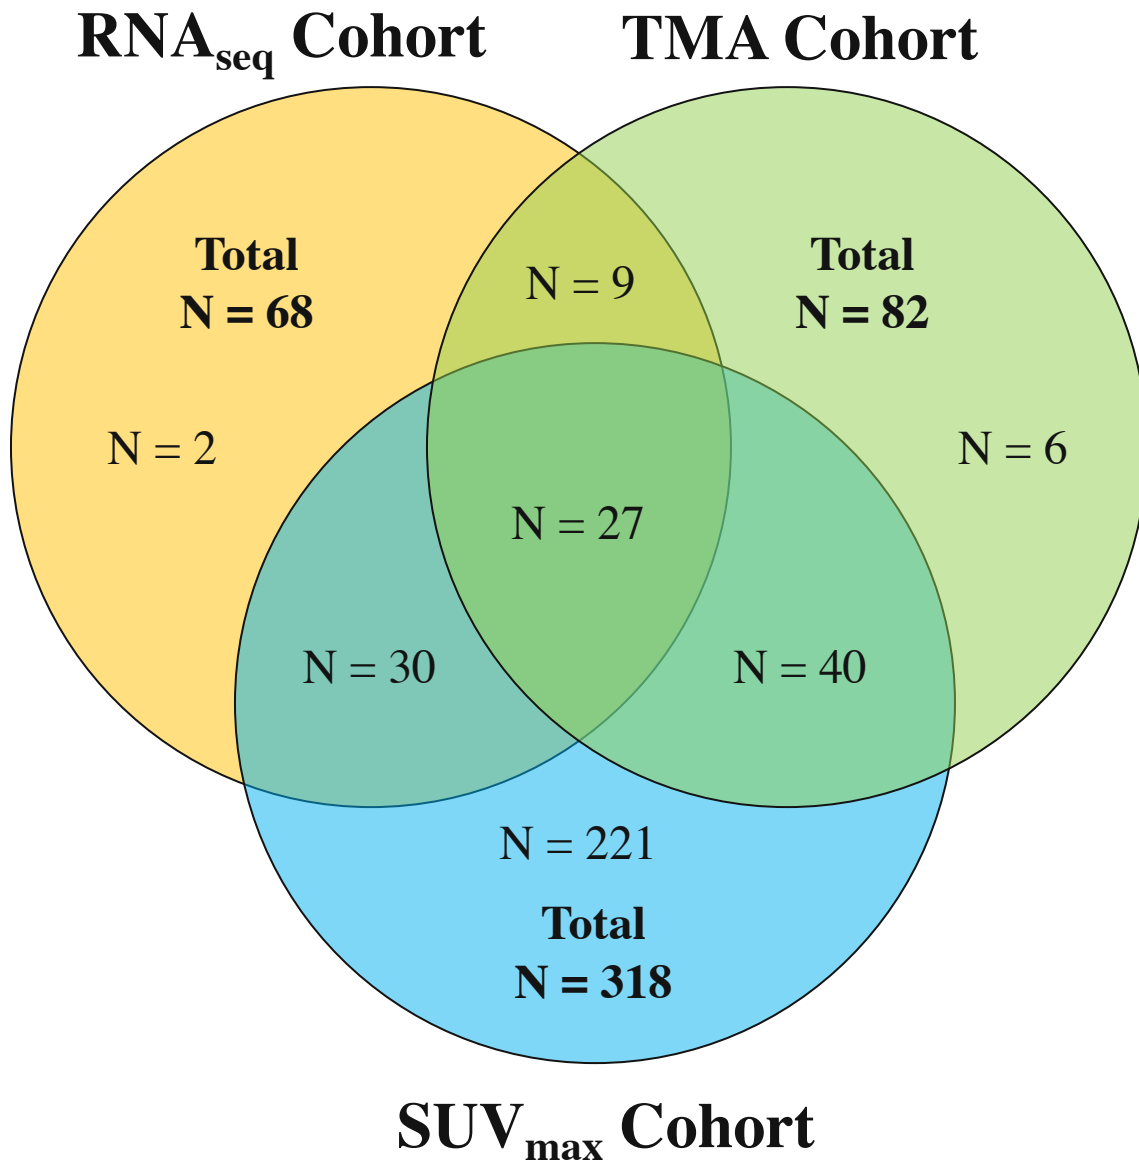

**Figure 1S.** Number of patients in each of the patient cohorts used, and overlap between the cohorts.

Supplement: NIHMS1692609-supplement-1.pdf [file NIHMS1692609-supplement-1.pdf]
